# Supplementary material for: Superior pseudocapacitive performance of a nanocomposite of graphdiyne nanoflakes decorated with poly(4-chloroaniline)
Source: Royal Society of Chemistry journal article supplement (doi:10.1039/d5nr01791b), 2025-01-01
Supplement: d5nr01791b16.pdf [file d5nr01791b16.pdf]

| Sample     | $A_{\text{BET}} / \text{m}^2 \text{g}^{-1}$ | $V_{\text{p}} / \text{cm}^3 \text{g}^{-1}$ | $r_{\text{p,peak}} / \text{nm}$ |
|------------|---------------------------------------------|--------------------------------------------|---------------------------------|
| GDY        | 226.7                                       | 0.558                                      | 1.88                            |
| GDY-PpCANI | 122.6                                       | 0.375                                      | 1.88                            |

Abbreviations:

$A_{\text{BET}}$ : Real surface area obtained by measuring BET adoption/desorption isotherm

$V_{\text{p}}$ : Surface pore volume per weight

$r_{\text{p,peak}}$ : The highest pore radius
