# Supplementary figures and images for: Superior pseudocapacitive performance of a nanocomposite of graphdiyne nanoflakes decorated with poly(4-chloroaniline)
Source: Royal Society of Chemistry journal article supplement (doi:10.1039/d5nr01791b), 2025-01-01

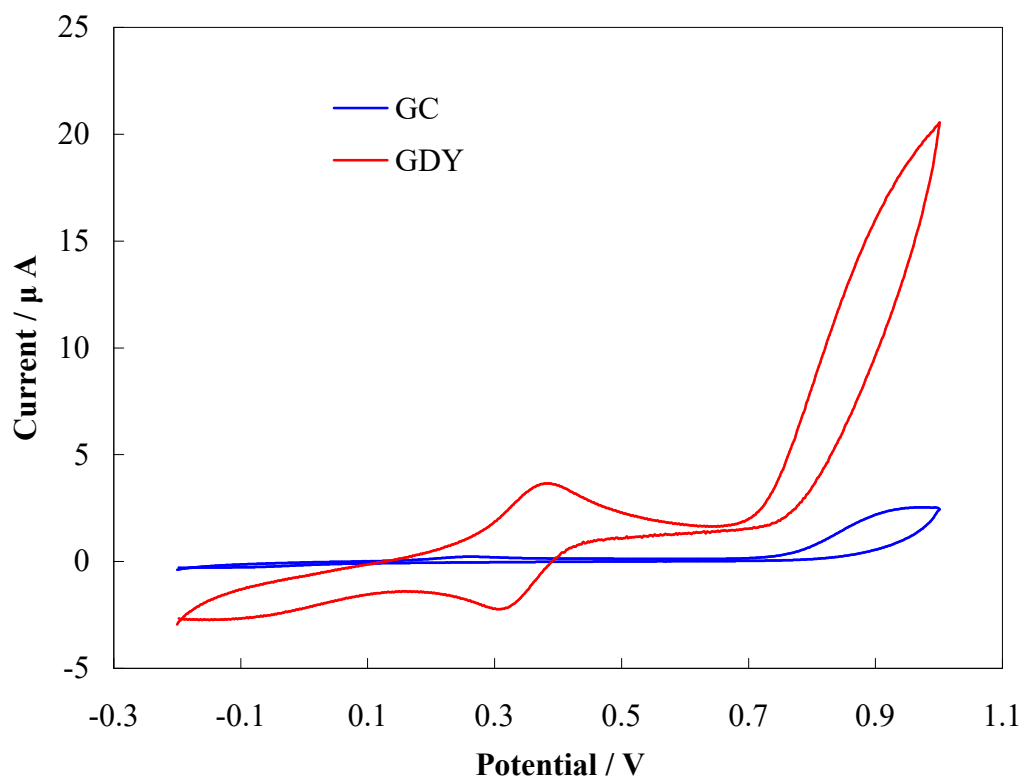

Supplement: d5nr01791b17.pdf [file d5nr01791b17.pdf]

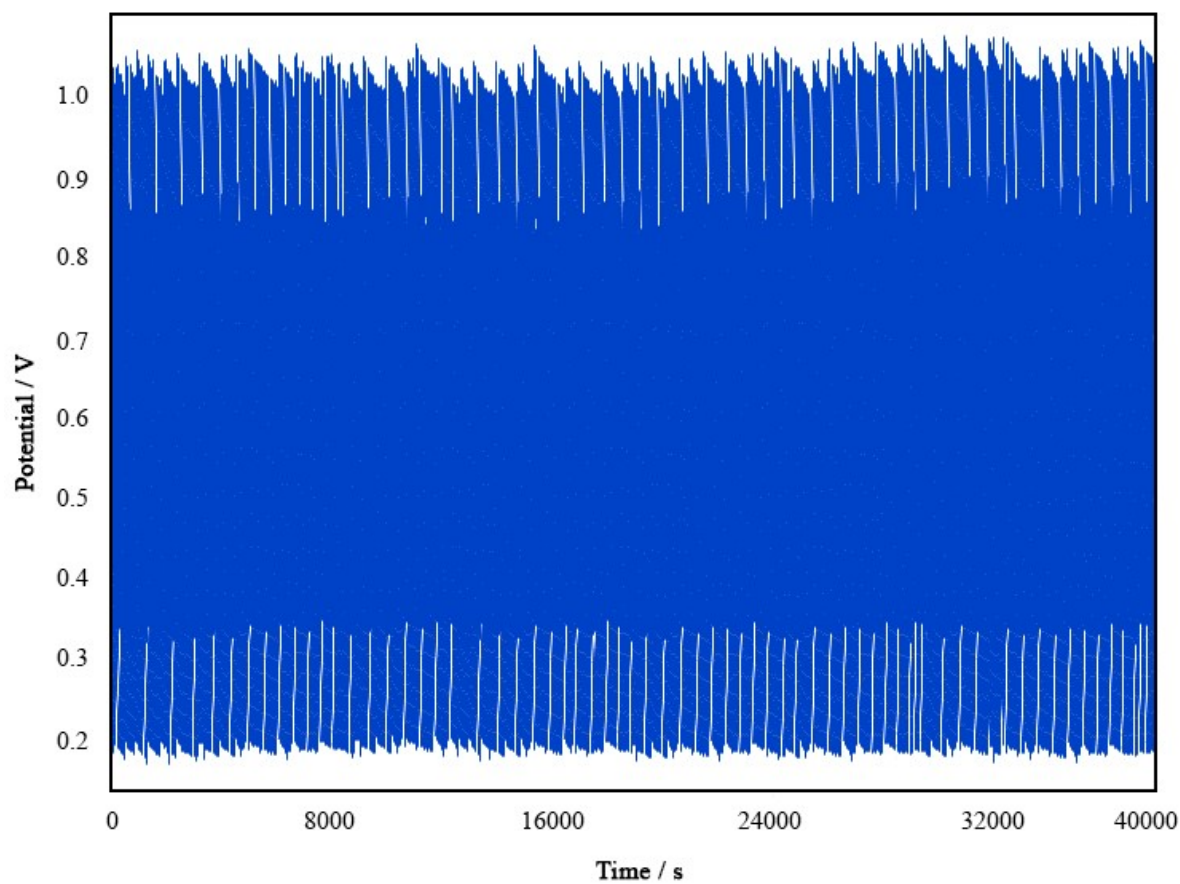

Supplement: d5nr01791b21.pdf [file d5nr01791b21.pdf]

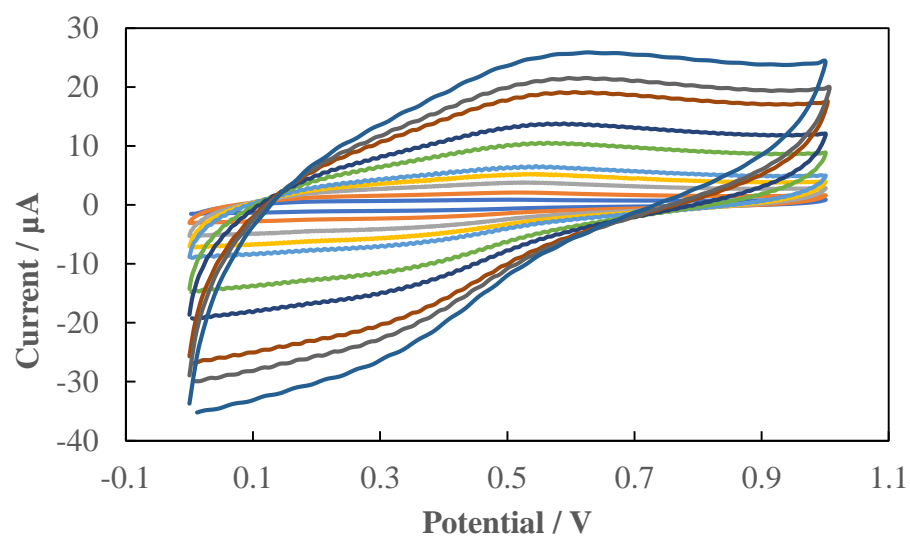

Supplement: d5nr01791b4.pdf [file d5nr01791b4.pdf]
